# Supplementary material for: Influence of the Washing Process and the Time of Fruit Harvesting Throughout the Day on Quality and Chemosensory Profile of Organic Extra Virgin Olive Oils
Source: MDPI journal article supplement (doi:10.3390/foods11193004), 2022-09-27
Supplement: s1 [file s1]

Table S1. Total Area of volatile compounds determined in organic Picual olive oil from washed olives by the HSSE-PDMS-GC-MS method.

| Compounds             |  |     |  | LRI  |                |           |         | ID      |         |         |     | Odour Descr. |         |         |         | WASHED        |         |                 |         |         |                |   |                  |        |   |                |  | TT*              |  |
|-----------------------|--|-----|--|------|----------------|-----------|---------|---------|---------|---------|-----|--------------|---------|---------|---------|---------------|---------|-----------------|---------|---------|----------------|---|------------------|--------|---|----------------|--|------------------|--|
|                       |  |     |  |      |                |           |         |         |         |         |     |              |         |         |         | Day 1         |         |                 |         | Day 15  |                |   |                  | Day 32 |   |                |  |                  |  |
|                       |  |     |  |      |                |           |         |         |         |         |     |              |         |         |         | MORNING (WM1) |         | AFTERNOON (WA1) |         | T       | MORNING (WM15) |   | AFTERNOON (WA15) |        | T | MORNING (WM32) |  | AFTERNOON (WA32) |  |
| Mean                  |  | ±SD |  | Mean | ±SD            |           | Media   | ±SD     |         | Media   | ±SD |              | Media   | ±SD     |         | Media         | ±SD     |                 | M       | A       |                |   |                  |        |   |                |  |                  |  |
| Acetic acid esters    |  |     |  |      |                |           |         |         |         |         |     |              |         |         |         |               |         |                 |         |         |                |   |                  |        |   |                |  |                  |  |
| Hexyl acetate         |  |     |  | 1247 | A              | Fruity    | 295318  | 9490    | 162483  | 87966   | b   | 269551       | 29926   | 165826  | 228825  | b             | 820213  | 22747           | 633566  | 84722   | a              |   |                  |        |   |                |  |                  |  |
| (Z)-3-Hexenyl acetate |  |     |  | 1291 | A              | Green     | 2234069 | 244982  | 1224258 | 574755  | b   | 1645140      | 216040  | 777045  | 1313698 | b             | 4123737 | 174669          | 3031396 | 701208  | a              |   |                  |        |   |                |  |                  |  |
| Acids                 |  |     |  |      |                |           |         |         |         |         |     |              |         |         |         |               |         |                 |         |         |                |   |                  |        |   |                |  |                  |  |
| Hexanoic acid         |  |     |  | 1841 | A              | Fatty     | 231558  | 117398  | 604222  | 346628  |     | 918927       | 154870  | 200350  | 389097  |               | 509981  | 397925          | 399836  | 707077  |                |   |                  |        |   |                |  |                  |  |
| Nonanoic acid         |  |     |  | 2168 | B <sup>1</sup> | Waxy      | 657898  | 694488  | 690724  | 377810  |     | 676645       | 120820  | 407964  | 269276  |               | 344677  | 662294          | 737104  | 521137  |                |   |                  |        |   |                |  |                  |  |
| Alcohols              |  |     |  |      |                |           |         |         |         |         |     |              |         |         |         |               |         |                 |         |         |                |   |                  |        |   |                |  |                  |  |
| Methyl Alcohol        |  |     |  | 884  | B <sup>2</sup> | Alcoholic | 1169038 | 1055841 | 7230893 | 349024  |     | 1398755      | 167436  | 805153  | 6075672 |               | 631659  | 213016          | 1524508 | 526253  |                |   |                  |        |   |                |  |                  |  |
| Ethanol               |  |     |  | 912  | A              | Alcoholic | 593238  | 167035  | 846285  | 93638   | b   | 2743913      | 83174   | 639363  | 606854  | b             | 3322023 | 684458          | 4145507 | 1830374 | a              |   |                  |        |   |                |  |                  |  |
| 1-Penten-3-ol         |  |     |  | 1138 | A              | Green     | 1212044 | 34675   | 555698  | 475776  |     | 876366       | 186475  | 424138  | 25426   |               | 469707  | 24510           | 400972  | 332032  | a              | b |                  |        |   |                |  |                  |  |
| 2-Hexyn-1-ol          |  |     |  | 1200 | B <sup>2</sup> | -         | 2372765 | 156086  | 1013047 | 1013624 | a   | 1676786      | 500976  | 328715  | 788075  | b             | 282231  | 14599           | 357329  | 960533  | b              |   |                  |        |   |                |  |                  |  |
| (Z)-2-Penten-1-ol     |  |     |  | 1310 | A              | -         | 1915287 | 20855   | 885381  | 711537  |     | 1197800      | 183098  | 435050  | 200897  |               | 712397  | 34588           | 614156  | 556643  | a              | b |                  |        |   |                |  |                  |  |
|                       |  |     |  |      |                | Herbal,   |         |         |         |         |     |              |         |         |         |               |         |                 |         |         |                |   |                  |        |   |                |  |                  |  |
| 1-Hexanol             |  |     |  | 1345 | A              | Green     | 443418  | 45296   | 225412  | 135629  |     | 464048       | 38173   | 1543780 | 357046  |               | 664828  | 21435           | 532903  | 752764  |                |   |                  |        |   |                |  |                  |  |
| (Z)-3-Hexen-1-ol      |  |     |  | 1374 | A              | Green     | 2062936 | 145145  | 1692921 | 186674  |     | 1699105      | 237851  | 7672215 | 902458  |               | 1519889 | 73836           | 1196197 | 4186705 |                |   |                  |        |   |                |  |                  |  |
| (E)-2-Hexen-1-ol      |  |     |  | 1396 | A              | Fruity    | 101330  | 31043   | 226368  | 106507  |     | 109753       | 13017   | 1348470 | 16299   |               | 75602   | 7462            | 65531   | 879632  |                |   |                  |        |   |                |  |                  |  |
| 2-Furanmethanol       |  |     |  | 1654 | A              | Bready    | 2815666 | 603231  | 1449111 | 735841  |     | 1358478      | 1183802 | 1230065 | 546050  |               | 1694765 | 192640          | 1305560 | 187125  |                |   |                  |        |   |                |  |                  |  |
| 1-Undecanol           |  |     |  | 1861 | A              | Waxy      | 1608656 | 303021  | 935589  | 819949  |     | 642526       | 243598  | 928441  | 6543    |               | 1523691 | 193320          | 728269  | 105474  |                |   |                  |        |   |                |  |                  |  |
| 1-Dodecanol           |  |     |  | 1964 | A              | Waxy      | 2025033 | 990583  | 1600993 | 181878  |     | 1326333      | 866350  | 1490232 | 381742  |               | 953913  | 785634          | 1828283 | 276926  |                |   |                  |        |   |                |  |                  |  |
| Phenol                |  |     |  | 2003 | B <sup>2</sup> | Phenolic  | 366227  | 107725  | 255883  | 49079   |     | 193444       | 115785  | 193267  | 28278   |               | 205388  | 57711           | 233056  | 29055   |                |   |                  |        |   |                |  |                  |  |
| 2-Phenoxyethanol      |  |     |  | 2152 | B <sup>2</sup> | Floral    | 374629  | 159926  | 160840  | 247203  |     | 180098       | 20039   | 175381  | 10671   |               | 157185  | 85454           | 185455  | 46081   |                |   |                  |        |   |                |  |                  |  |
| 1-Hexadecanol         |  |     |  | 2376 | B <sup>3</sup> | Waxy      | 412892  | 67847   | 450201  | 136947  |     | 370906       | 38147   | 588281  | 435823  |               | 482251  | 192452          | 743951  | 57478   |                |   |                  |        |   |                |  |                  |  |
| Aldehydes             |  |     |  |      |                |           |         |         |         |         |     |              |         |         |         |               |         |                 |         |         |                |   |                  |        |   |                |  |                  |  |
| Hexanal               |  |     |  | 1037 | A              | Green     | 3372282 | 62518   | 2674095 | 454086  |     | 4947488      | 202071  | 1741337 | 1114623 |               | 2965551 | 480975          | 2566368 | 2507582 | a              | b |                  |        |   |                |  |                  |  |

|                         |      |                |                     |          |         |          |           |          |         |         |          |          |        |         |          |          |          |
|-------------------------|------|----------------|---------------------|----------|---------|----------|-----------|----------|---------|---------|----------|----------|--------|---------|----------|----------|----------|
| 3-Methyl-2-butenal      | 1089 |                | Green               | 495564   | 3916    | 348175   | 126267    | 393348   | 69491   | 0       | 171998   | 147026   | 10900  | 162375  | 283589   |          |          |
| (Z)-2-Hexenal           | 1091 | B <sup>2</sup> | Green               | 1027580  | 285962  | 367141   | 623033    | 856412   | 324     | 0       | 441398   | 113069   | 141546 | 124317  | 534802   | <i>a</i> | <i>b</i> |
| (E)-2-Hexenal           | 1193 | B <sup>2</sup> | Green               | 17699433 | 1008983 | 8346466  | 6056111   | 23355622 | 647163  | 1308938 | 621470   | 10864006 | 801967 | 8633047 | 15990347 | <i>a</i> | <i>b</i> |
| Nonanal                 | 1372 | B <sup>1</sup> | Aldehycic           | 3524212  | 921461  | 3706600  | 1197623   | 2712983  | 38109   | 3201342 | 573328   | 2560991  | 32196  | 2991517 | 329149   |          |          |
| Decanal                 | 1484 | A              | Aldehycic           | 1358374  | 713879  | 1160936  | 488685    | 820568   | 113950  | 775398  | 222548   | 669749   | 80789  | 1078262 | 72338    |          |          |
| Benzaldehyde            | 1504 | B <sup>2</sup> | Fruity              | 820631   | 294862  | 463061   | 100874    | 559334   | 59578   | 304478  | 135921   | 396236   | 47225  | 504171  | 203861   |          |          |
| (E)-2-Nonenal           | 1522 | A              | Fatty<br>Caramelli  | 214806   | 33869   | 194554   | 13842     | 250348   | 5898    | 140844  | 41677    | 153838   | 16988  | 172686  | 85928    |          |          |
| 5-Methylfurfural        | 1559 | B <sup>4</sup> | c                   | 166169   | 11192   | 101310   | 48582     | 93412    | 21172   | 75635   | 25676    | 104156   | 3769   | 90185   | 14492    |          |          |
| (E)-2-Decenal           | 1641 | B <sup>5</sup> | Waxy                | 392955   | 77307   | 466740   | 106925    | 478968   | 30456   | 362124  | 96141    | 338410   | 52334  | 435636  | 108834   |          |          |
| 2-Undecenal             | 1740 | B <sup>2</sup> | Fruity              | 488662   | 168115  | 838816   | 339024    | 710192   | 61269   | 539272  | 295988   | 536789   | 120645 | 761410  | 181185   |          |          |
| <b>Hydrocarbures</b>    |      |                |                     |          |         |          |           |          |         |         |          |          |        |         |          |          |          |
| Hexadecane              | 1586 | B <sup>2</sup> | -                   | 429722   | 140259  | 338239   | 50655     | 389239   | 10005   | 262600  | 164194   | 269068   | 147863 | 404252  | 163482   |          |          |
| Nonadecane              | 1886 | B <sup>2</sup> | -                   | 211381   | 86438   | 274010   | 42725     | 261718   | 28070   | 205012  | 166661   | 203274   | 118770 | 199419  | 99485    |          |          |
| (Z)-1-Methoxyhex-3-ene  | 965  | B <sup>2</sup> | Green               | 1224610  | 7272    | 551063   | 115435    | 1413941  | 240137  | 749901  | 398145   | 1710065  | 32494  | 1260785 | 485798   |          |          |
| 3-Ethyl-1,5-octadiene   | 982  | B <sup>2</sup> | -                   | 1654513  | 146     | 942976   | 475054    | 1496310  | 151900  | 592661  | 228026   | 581359   | 113353 | 533067  | 695656   | <i>a</i> | <i>b</i> |
| Pentadecane             | 1489 | C              | -                   | 572629   | 148520  | 302359   | 104544    | 308661   | 68373   | 240435  | 110327   | 273599   | 33125  | 296873  | 64809    |          |          |
| Heptadecane             | 1700 | B <sup>2</sup> | -                   | 475797   | 295609  | 461060   | 6513      | 453969   | 4140    | 239834  | 285907   | 280164   | 232375 | 373595  | 267643   |          |          |
| Octadecane              | 1800 | B <sup>2</sup> | -                   | 347781   | 242852  | 385546   | 11347     | 430862   | 64      | 233626  | 266701   | 249244   | 198560 | 232613  | 238750   |          |          |
| <b>Esters</b>           |      |                |                     |          |         |          |           |          |         |         |          |          |        |         |          |          |          |
| Isopropyl Myristate     | 2023 | B <sup>2</sup> | -                   | 1201802  | 240743  | 1138782  | 400607    | 977683   | 149612  | 1230700 | 1048223  | 898534   | 354080 | 1966556 | 1866     |          |          |
| Methyl palmitate        | 2203 | B <sup>2</sup> | Waxy                | 412185   | 215546  | 597447   | 371834    | 537873   | 177280  | 454701  | 1460433  | 353577   | 282736 | 673172  | 200183   |          |          |
| Isopropyl Palmitate     | 2230 | B <sup>2</sup> | -                   | 371486   | 216699  | 799716   | 352164    | 482864   | 320684  | 574118  | 1013616  | 383012   | 287051 | 1282093 | 79003    | <i>b</i> | <i>a</i> |
| Methyl dihydrojasmonate | 2280 | B <sup>2</sup> | Floral              | 514117   | 348233  | 621948   | 104915    | 1560915  | 92849   | 381831  | 138650   | 296125   | 286663 | 462158  | 977077   |          |          |
| <b>Ketones</b>          |      |                |                     |          |         |          |           |          |         |         |          |          |        |         |          |          |          |
| 4-Methyl-2-hexanone     | 842  | C              | -                   | 6760720  | 2731197 | 10046807 | 3929562 a | 4606456  | 549724  | 3948662 | 532109 b | 3096752  | 805502 | 6546884 | 864349   | ab       |          |
| 2-Pentanone             | 940  | B <sup>2</sup> | Fruity              | 1486259  | 278974  | 840093   | 300902    | 749163   | 254601  | 6465266 | 514377   | 875565   | 47562  | 733593  | 4018110  |          |          |
| 1-Penten-3-one          | 976  | B <sup>2</sup> | Spicy               | 2274106  | 52591   | 1090078  | 846696    | 2085248  | 300348  | 20596   | 825553   | 970197   | 95331  | 948853  | 1507630  | <i>a</i> | <i>b</i> |
| 2-Octanone              | 1262 | A              | Earthy<br>Caramelli | 555307   | 43983   | 723890   | 155198 a  | 205850   | 32883   | 145318  | 70839 b  | 147034   | 19417  | 163142  | 52515    | b        |          |
| 1-Hydroxy-2-propanone   | 1283 | A              | c                   | 6536297  | 1513555 | 2799448  | 1946475   | 2544120  | 3148689 | 2686679 | 3002409  | 3264391  | 484389 | 2159632 | 141394   |          |          |

|                                        |      |                |                 |         |        |        |        |   |        |        |        |        |        |         |        |        |        |     |
|----------------------------------------|------|----------------|-----------------|---------|--------|--------|--------|---|--------|--------|--------|--------|--------|---------|--------|--------|--------|-----|
| 6-Methyl-5-hepten-2-one                | 1316 | A              | Green           | 674811  | 139713 | 467830 | 74448  | a | 306942 | 26521  | 359247 | 49725  | b      | 221123  | 19711  | 358359 | 27126  | b   |
| 1-Hydroxy-2-butanone                   | 1358 | B <sup>2</sup> | Coffe           | 463585  | 189319 | 155550 | 146216 |   | 149737 | 281080 | 176018 | 231412 |        | 222990  | 8355   | 120495 | 14369  |     |
| Acetophenone                           | 1637 | A              | Floral          | 195514  | 17245  | 310622 | 184953 |   | 204335 | 17622  | 113176 | 97403  |        | 117712  | 108579 | 324547 | 118752 |     |
| 1,2-Cyclopentanedione                  | 1771 | B <sup>2</sup> | Floral          | 1429999 | 10875  | 709764 | 621887 |   | 743416 | 673583 | 848281 | 193979 |        | 1012135 | 4082   | 665223 | 72106  | a b |
| 2-Hydroxy-3-methyl-2-cyclopenten-1-one | 1834 | B <sup>2</sup> | -               | 336573  | 124835 | 150328 | 106605 |   | 130506 | 142938 | 152782 | 208142 |        | 181493  | 1763   | 112598 | 14867  |     |
| <b>Lactones</b>                        |      |                |                 |         |        |        |        |   |        |        |        |        |        |         |        |        |        |     |
| 5-Ethyl-2(5H)-furanone                 | 1581 | B <sup>2</sup> | -               | 741866  | 483466 | 273502 | 517351 |   | 620805 | 303247 | 0      | 333785 |        | 305461  | 34543  | 260149 | 471465 | a b |
| γ-Butyrolactone                        | 1620 | A              | Creamy          | 767850  | 164385 | 319821 | 231698 |   | 297185 | 384848 | 281480 | 263856 |        | 351041  | 50105  | 282029 | 36161  |     |
| 2(5H)-Furanone                         | 1747 | A              | Buttery         | 1132047 | 108662 | 551985 | 380484 |   | 492142 | 485209 | 481938 | 254176 |        | 620351  | 63685  | 506154 | 39062  |     |
| 2-Hydroxy-γ-butyrolactone              | 2189 | C              | Creamy          | 550441  | 113124 | 279571 | 145643 |   | 262984 | 240311 | 395388 | 185185 |        | 411501  | 71871  | 220339 | 57684  |     |
| <b>(Sesqui)Terpenes</b>                |      |                |                 |         |        |        |        |   |        |        |        |        |        |         |        |        |        |     |
| Copaene                                | 1468 | C              | Woody,<br>Spicy | 155003  | 30830  | 76472  | 40791  |   | 103519 | 25571  | 124322 | 23393  |        | 105396  | 13214  | 75110  | 8066   |     |
| α-Farnesene                            | 1724 | B <sup>2</sup> | Woody,<br>Green | 167019  | 42082  | 111362 | 32466  | b | 248249 | 39441  | 133926 | 53485  | a<br>b | 328618  | 68894  | 246392 | 115289 | a   |
| <b>Others</b>                          |      |                |                 |         |        |        |        |   |        |        |        |        |        |         |        |        |        |     |
| Pyrrole                                | 1492 | B <sup>2</sup> | Nutty           | 179452  | 58749  | 105071 | 25727  |   | 83696  | 51208  | 75933  | 26548  |        | 86256   | 13215  | 94149  | 12100  |     |
| Acetamide                              | 1790 | B <sup>2</sup> | -               | 207485  | 110355 | 160756 | 3900   |   | 90070  | 123688 | 85855  | 91597  |        | 98729   | 33406  | 175329 | 19863  |     |

LRI: Experimental Linear Retention Index values estimated by linear regression. ID: reliability of identification: A. mass spectrum and LRI agreed with standards; B. mass spectrum agreed with mass spectral data base and LRI agreed with the literature data; C. mass spectrum agreed with mass spectral data base. Odour Descriptor: information obtained from The good scents company (<http://www.thegoodscentscompany.com>). Literature reference agreed with LRI data: <sup>1</sup>da Silva, Freitas, Cabrita & Garcia, (2012) [67]. <sup>2</sup>National Center for Biotechnology Information (2005) [68]. <sup>3</sup>Liang, Chen, Reeves & Han, (2013) [69]. <sup>4</sup>Fan & Qian (2006) [70]. <sup>5</sup>Sales et al., (2019) [71]. Mean: mean area values. SD: standard deviation. TTdays: Tukey's test (p<0.05) between the morning and afternoon harvest for each day. Different lower case letters indicate significant difference between days (where a>b). T\*: Tukey's test (p<0.05) among between the morning and afternoon harvest, regardless of the day. Different lower case italic letters indicate significant difference between days (where a>b). M: Morning; A: Afternoon.

**Table S2.** Total area of volatile compounds determined in organic Picual olive oil from non-washed olives by the HSSE-PDMS-GC-MS method.

|                       |      |                | NON-WASHED    |                |       |                  |         |   |                 |         |                   |         |    |                 |         |                   |         |   |    |   |   |
|-----------------------|------|----------------|---------------|----------------|-------|------------------|---------|---|-----------------|---------|-------------------|---------|----|-----------------|---------|-------------------|---------|---|----|---|---|
|                       |      |                | Day 1         |                |       |                  | Day15   |   |                 |         | Day 32            |         |    |                 |         |                   |         |   |    |   |   |
| Compounds             | LRI  | ID             | Odour Descr.  | MORNING (NWM1) |       | AFTERNOON (NWA1) |         | T | MORNING (NWM15) |         | AFTERNOON (NWA15) |         | T  | MORNING (NWM32) |         | AFTERNOON (NWA32) |         | T | TT |   |   |
|                       |      |                |               | Media          | ±SD   | Media            | ±SD     |   | Media           | ±SD     | Media             | ±SD     |    | Media           | ±SD     | Media             | ±SD     |   |    |   |   |
| Acetic acid esters    |      |                |               |                |       |                  |         |   |                 |         |                   |         |    |                 |         |                   |         |   |    | a | b |
| Hexyl acetate         | 1247 | A              | Fruity        | 272711         | 251   | 139295           | 311259  | b | 441100          | 6816    | 246392            | 488867  | b  | 761543          | 88081   | 543043            | 216237  | a |    |   |   |
| (Z)-3-Hexenyl acetate | 1291 | A              | Green         | 2031009        | 74    | 1029263          | 1590334 | b | 2896687         | 55636   | 1619090           | 2168711 | ab | 3900895         | 330117  | 2633383           | 565995  | a |    |   |   |
| Acids                 |      |                |               |                |       |                  |         |   |                 |         |                   |         |    |                 |         |                   |         |   |    |   |   |
| Hexanoic acid         | 1841 | A              | Fatty         | 170427         | 25154 | 290475           | 620709  |   | 291720          | 399001  | 353563            | 214882  |    | 195896          | 35120   | 343105            | 136464  |   |    |   |   |
| Nonanoic acid         | 2168 | B <sup>1</sup> | Waxy          | 764275         | 3452  | 264623           | 432164  |   | 150058          | 7166    | 746147            | 257770  |    | 349076          | 414748  | 579778            | 340588  |   |    |   |   |
| Alcohols              |      |                |               |                |       |                  |         |   |                 |         |                   |         |    |                 |         |                   |         |   |    |   |   |
| Methyl Alcohol        | 884  | B <sup>2</sup> | Alcoholic     | 1350368        | 312   | 1577160          | 318082  |   | 1386536         | 1982444 | 1071761           | 616015  |    | 788414          | 185513  | 453986            | 377204  |   |    |   |   |
| Ethanol               | 912  | A              | Alcoholic     | 1310486        | 7     | 16871965         | 3358745 |   | 4735263         | 66388   | 4365702           | 149442  |    | 4677828         | 257574  | 3510761           | 2159747 |   |    |   |   |
| 1-Penten-3-ol         | 1138 | A              | Green         | 1122675        | 215   | 238794           | 82817   |   | 696469          | 8631    | 471587            | 52594   |    | 429824          | 36940   | 411558            | 497535  | a | b  |   |   |
| 2-Hexyn-1-ol          | 1200 | B <sup>2</sup> | -             | 2468968        | 694   | 150513           | 14545   |   | 1939985         | 44167   | 1188785           | 21903   |    | 259013          | 49452   | 228287            | 1529911 |   |    |   |   |
| (Z)-2-Penten-1-ol     | 1310 | A              | -             | 1812679        | 4512  | 466796           | 287046  |   | 978226          | 17790   | 703961            | 93273   |    | 723863          | 62904   | 664813            | 822646  | a | b  |   |   |
| 1-Hexanol             | 1345 | A              | Herbal, Green | 372282         | 541   | 1753531          | 705928  |   | 806984          | 40570   | 339223            | 144898  |    | 676352          | 59887   | 485353            | 91179   |   |    |   |   |
| (Z)-3-Hexen-1-ol      | 1374 | A              | Green         | 1989706        | 212   | 7826732          | 4436267 |   | 2304470         | 64028   | 1126244           | 70501   |    | 1515249         | 116941  | 1097073           | 566249  |   |    |   |   |
| (E)-2-Hexen-1-ol      | 1396 | A              | Fruity        | 93289          | 2556  | 1030591          | 902947  |   | 87004           | 23982   | 60663             | 31234   |    | 64671           | 4812    | 74751             | 14886   |   |    |   |   |
| 2-Furanmethanol       | 1654 | A              | Bready        | 2691135        | 153   | 1029416          | 874351  |   | 1786234         | 362985  | 1409545           | 527101  |    | 1391741         | 347052  | 1169436           | 1153107 | a | b  |   |   |
| 1-Undecanol           | 1861 | A              | Waxy          | 1651083        | 25    | 935526           | 91464   |   | 748492          | 1219650 | 1361458           | 918770  |    | 906768          | 176324  | 613402            | 528710  |   |    |   |   |
| 1-Dodecanol           | 1964 | A              | Waxy          | 2250822        | 315   | 898601           | 399154  |   | 1134304         | 784599  | 1758153           | 565966  |    | 1167883         | 1158964 | 1823112           | 818425  |   |    |   |   |
| Phenol                | 2003 | B <sup>2</sup> | Phenolic      | 385886         | 254   | 159627           | 116830  |   | 221135          | 51355   | 222397            | 46739   |    | 206128          | 79791   | 235637            | 185585  |   |    |   |   |
| 2-Phenoxyethanol      | 2152 | B <sup>2</sup> | Floral        | 264810         | 541   | 166256           | 3762    |   | 160273          | 50869   | 214590            | 66284   |    | 107814          | 24260   | 171112            | 72215   |   |    |   |   |
| 1-Hexadecanol         | 2376 | B <sup>3</sup> | Waxy          | 519243         | 62    | 447104           | 64775   |   | 181217          | 209188  | 497195            | 410469  |    | 279673          | 490060  | 451008            | 211515  |   |    |   |   |

|                         |      |                |            |          |        |         |         |          |         |          |         |         |         |         |         |        |        |   |
|-------------------------|------|----------------|------------|----------|--------|---------|---------|----------|---------|----------|---------|---------|---------|---------|---------|--------|--------|---|
| Aldehydes               |      |                |            |          |        |         |         |          |         |          |         |         |         |         |         |        |        |   |
| Hexanal                 | 1037 | A              | Green      | 3193183  | 4113   | 1787056 | 1597414 | 3596590  | 165614  | 2370628  | 1068446 | 2317005 | 276551  | 2161385 | 827926  | a      | b      |   |
| 3-Methyl-2-butenal      | 1089 |                | Green      | 480584   | 2551   | 0       | 228347  | 345674   | 2711    | 264177   | 166928  | 160425  | 12036   | 155495  | 181961  | a      | b      |   |
| (Z)-2-Hexenal           | 1091 | B <sup>2</sup> | Green      | 1060727  | 21563  | 0       | 76049   | 906405   | 4858    | 521488   | 11747   | 88872   | 579     | 83908   | 641451  |        |        |   |
| (E)-2-Hexenal           | 1193 | B <sup>2</sup> | Green      | 18847598 | 1553   | 1829105 | 4781636 | 17909314 | 69266   | 13831812 | 4364939 | 9671635 | 949465  | 7668852 | 7338040 | a      | b      |   |
| Nonanal                 | 1372 | B <sup>1</sup> | Aldehycic  | 4127582  | 213    | 2736017 | 7620    | 3390059  | 847203  | 2570819  | 488121  | 2742919 | 1275648 | 2829201 | 1694032 | a      | b      |   |
| Decanal                 | 1484 | A              | Aldehycic  | 1478251  | 2215   | 501755  | 32690   | 1257069  | 443049  | 774034   | 351913  | 724693  | 632456  | 775658  | 519607  | a      | b      |   |
| Benzaldehyde            | 1504 | B <sup>2</sup> | Fruity     | 864647   | 22036  | 307295  | 236372  | 587416   | 43463   | 313535   | 47824   | 364141  | 103544  | 353636  | 375254  | a      | b      |   |
| (E)-2-Nonenal           | 1522 | A              | Fatty      | 194983   | 1256   | 133905  | 45097   | ab       | 227358  | 82180    | 169105  | 33564   | a       | 106432  | 47125   | 133210 | 49381  | b |
| 5-Methylfurfural        | 1559 | B <sup>4</sup> | Caramellic | 172149   | 2156   | 76802   | 59658   | 125721   | 17152   | 88139    | 26463   | 89281   | 31462   | 75270   | 82741   | a      | b      |   |
| (E)-2-Decenal           | 1641 | B <sup>5</sup> | Waxy       | 398320   | 3165   | 347408  | 173847  | ab       | 439605  | 131928   | 421133  | 66162   | a       | 253698  | 112135  | 358833 | 74444  | b |
| 2-Undecenal             | 1740 | B <sup>2</sup> | Fruity     | 600575   | 36102  | 547058  | 277141  | 532460   | 230159  | 773939   | 153452  | 401084  | 184757  | 649378  | 36536   |        |        |   |
| Hydrocarbures           |      |                |            |          |        |         |         |          |         |          |         |         |         |         |         |        |        |   |
| Hexadecane              | 1586 | B <sup>2</sup> | -          | 458767   | 51525  | 281097  | 28766   | 299437   | 129481  | 389569   | 80510   | 259892  | 191992  | 355409  | 91548   |        |        |   |
| Nonadecane              | 1886 | B <sup>2</sup> | -          | 358358   | 22563  | 212570  | 10427   | 137968   | 56822   | 391233   | 22608   | 213343  | 79066   | 259292  | 175654  |        |        |   |
| (Z)-1-Methoxyhex-3-ene  | 965  | B <sup>2</sup> | Green      | 1152245  | 2515   | 508003  | 202755  | 1562680  | 30470   | 883479   | 831556  | 1641580 | 218152  | 1145106 | 21804   | a      | b      |   |
| 3-Ethyl-1,5-octadiene   | 982  | B <sup>2</sup> | -          | 1784845  | 154641 | 856464  | 39132   | a        | 1278233 | 1043     | 884274  | 5874    | ab      | 609768  | 48665   | 535637 | 966994 | b |
| Pentadecane             | 1489 | C              | -          | 487654   | 2113   | 193708  | 136904  | 394685   | 80205   | 277934   | 87477   | 255399  | 112696  | 235706  | 244316  | a      | b      |   |
| Heptadecane             | 1700 | B <sup>2</sup> | -          | 609552   | 222665 | 351088  | 74902   | 248438   | 125039  | 516580   | 59402   | 322259  | 142764  | 542013  | 144808  |        |        |   |
| Octadecane              | 1800 | B <sup>2</sup> | -          | 567775   | 64565  | 316435  | 6388    | 184971   | 115802  | 555541   | 40977   | 292138  | 93150   | 419717  | 212415  |        |        |   |
| Esters                  |      |                |            |          |        |         |         |          |         |          |         |         |         |         |         |        |        |   |
| Isopropyl Myristate     | 2023 | B <sup>2</sup> | -          | 1440100  | 225623 | 1029976 | 580205  | 600473   | 572424  | 1909365  | 479530  | 720464  | 405119  | 1371174 | 452704  |        |        |   |
| Methyl palmitate        | 2203 | B <sup>2</sup> | Waxy       | 711179   | 65526  | 840676  | 164666  | 275070   | 227348  | 875731   | 64498   | 444324  | 579250  | 500238  | 574298  |        |        |   |
| Isopropyl Palmitate     | 2230 | B <sup>2</sup> | -          | 398262   | 55621  | 645217  | 100770  | 214920   | 335896  | 882711   | 212862  | 285796  | 312652  | 1335852 | 282806  | b      | a      |   |
| Methyl dihydrojasmonate | 2280 | B <sup>2</sup> | Floral     | 949087   | 5211   | 537622  | 81832   | 368853   | 200000  | 940045   | 87035   | 339019  | 2548    | 635865  | 603101  |        |        |   |
| Ketones                 |      |                |            |          |        |         |         |          |         |          |         |         |         |         |         |        |        |   |
| 4-Methyl-2-hexanone     | 842  | C              | -          | 11359800 | 65413  | 6362457 | 23188   | 4501480  | 313712  | 5483010  | 30584   | 4136400 | 2268634 | 3851985 | 7123572 |        |        |   |
| 2-Pentanone             | 940  | B <sup>2</sup> | Fruity     | 1552972  | 3161   | 2369907 | 3739915 | a        | 867812  | 43719    | 617944  | 26640   | b       | 979447  | 179775  | 633952 | 798786 | b |
| 1-Penten-3-one          | 976  | B <sup>2</sup> | Spicy      | 2138943  | 215633 | 29982   | 1097289 | 1706216  | 117175  | 1274142  | 529338  | 967179  | 139281  | 862830  | 873586  | a      | b      |   |
| 2-Octanone              | 1262 | A              | Earthy     | 689932   | 25512  | 1553877 | 89433   | a        | 175132  | 19037    | 274717  | 21240   | b       | 182901  | 51221   | 158793 | 404459 | b |

|                                        |      |                |                 |         |       |         |        |         |        |         |         |         |        |         |         |        |       |   |
|----------------------------------------|------|----------------|-----------------|---------|-------|---------|--------|---------|--------|---------|---------|---------|--------|---------|---------|--------|-------|---|
| 1-Hydroxy-2-propanone                  | 1283 | A              | Caramellic      | 5984501 | 55264 | 1842868 | 926278 | 3179873 | 552776 | 2588823 | 1421832 | 2940142 | 454847 | 2117855 | 3115667 | a      | b     |   |
| 6-Methyl-5-hepten-2-one                | 1316 | A              | Green           | 610627  | 25113 | 322527  | 80410  | 938578  | 68782  | 329175  | 52155   | 213820  | 62486  | 250881  | 203374  |        |       |   |
| 1-Hydroxy-2-butanone                   | 1358 | B <sup>2</sup> | Coffe           | 398299  | 5215  | 136902  | 69037  | 203147  | 30984  | 149891  | 72663   | 178719  | 12670  | 147475  | 177505  | a      | b     |   |
| Acetophenone                           | 1637 | A              | Floral          | 399024  | 525   | 129569  | 14647  | 211238  | 17761  | 179424  | 24250   | 112522  | 256227 | 128010  | 342171  |        |       |   |
| 1,2-Cyclopentanedione                  | 1771 | B <sup>2</sup> | Floral          | 1215705 | 2563  | 705180  | 228282 | 998439  | 347002 | 778302  | 372502  | 773824  | 3974   | 588377  | 393986  | a      | b     |   |
| 2-Hydroxy-3-methyl-2-cyclopenten-1-one | 1834 | B <sup>2</sup> | -               | 280923  | 253   | 93050   | 65680  | 184442  | 61490  | 137816  | 87671   | 146854  | 2860   | 130129  | 105350  | a      | b     |   |
| Lactones                               |      |                |                 |         |       |         |        |         |        |         |         |         |        |         |         |        |       |   |
| 5-Ethyl-2(5H)-furanone                 | 1581 | B <sup>2</sup> | -               | 259302  | 25411 | 85354   | 972    | b       | 739424 | 47535   | 465452  | 104604  | a      | 210531  | 14063   | 64415  | 6849  | b |
| γ-Butyrolactone                        | 1620 | A              | Creamy          | 686135  | 2551  | 196986  | 164330 | 381036  | 57538  | 305841  | 152004  | 321875  | 79398  | 203765  | 353858  | a      | b     |   |
| 2(5H)-Furanone                         | 1747 | A              | Buttery         | 1085334 | 551   | 368114  | 312721 | 698299  | 145335 | 546069  | 212517  | 539666  | 128745 | 404765  | 569415  | a      | b     |   |
| 2-Hydroxy-γ-butyrolactone              | 2189 | C              | Creamy          | 506245  | 23512 | 191791  | 554    | 268159  | 66204  | 276196  | 243276  | 268029  | 54752  | 190055  | 261771  |        |       |   |
| (Sesqui)Terpenes                       |      |                |                 |         |       |         |        |         |        |         |         |         |        |         |         |        |       |   |
| Copaene                                | 1468 | C              | Woody,<br>Spicy | 159086  | 2255  | 73432   | 18850  | 116479  | 13473  | 98103   | 28219   | 85791   | 12268  | 66888   | 59553   | a      | b     |   |
| α-Farnesene                            | 1724 | B <sup>2</sup> | Woody,<br>Green | 182041  | 6314  | 86902   | 109696 | b       | 197397 | 94272   | 184804  | 162959  | ab     | 297967  | 21145   | 222196 | 52988 | a |
| Others                                 |      |                |                 |         |       |         |        |         |        |         |         |         |        |         |         |        |       |   |
| Pyrrole                                | 1492 | B <sup>2</sup> | Nutty           | 186217  | 2511  | 63826   | 57650  | 114980  | 25558  | 82748   | 30314   | 86332   | 33459  | 85888   | 89635   | a      | b     |   |
| Acetamide                              | 1790 | B <sup>2</sup> | -               | 235761  | 52654 | 73295   | 129835 | 120587  | 39207  | 112836  | 31344   | 105404  | 100254 | 115034  | 91938   |        |       |   |

LRI: Experimental Linear Retention Index values estimated by linear regression. ID: reliability of identification: A. mass spectrum and LRI agreed with standards; B. mass spectrum agreed with mass spectral data base and LRI agreed with the literature data; C. mass spectrum agreed with mass spectral data base. Odour Descriptor: information obtained from The good scents company (<http://www.thegoodscentscompany.com>). Literature reference agreed with LRI data: <sup>1</sup>da Silva, Freitas, Cabrita & Garcia, (2012) [67]. <sup>2</sup>National Center for Biotechnology Information (2005) [68]. <sup>3</sup>Liang, Chen, Reeves & Han, (2013) [69]. <sup>4</sup>Fan & Qian (2006) [70]. <sup>5</sup>Sales et al., (2019) [71]. Mean: mean area values. SD: standard deviation. TTdays: Tukey's test (p<0.05) between the morning and afternoon harvest for each day. Different lower case letters indicate significant difference between days (where a>b). T\*: Tukey's test (p<0.05) among between the morning and afternoon harvest, regardless of the day. Different lower case italic letters indicate significant difference between days (where a>b). M: Morning; A: Afternoon.
